# Supplementary material for: A lipid transfer protein variant with a mutant eight-cysteine motif causes photoperiod- and thermo-sensitive dwarfism in rice
Source: PubMed Central journal article supplement — J Exp Bot. 2019 Nov 8;71(4):1294–305. doi: 10.1093/jxb/erz500 (PMC7031082; doi:10.1093/jxb/erz500), 2019-11-08
Supplement: erz500_suppl_supplementary_figures_s1-s4_tables_s1-s2.pdf [file erz500_suppl_supplementary_figures_s1-s4_tables_s1-s2.pdf]

*Supplementary data*

**A lipid transfer protein variant with a mutant eight-cysteine motif causes photoperiod- and thermo-sensitive dwarfism in rice**

Wenjun Deng<sup>1,3,†</sup>, Riqing Li<sup>1,3,†</sup>, Yiwei Xu<sup>1,3,†</sup>, Runyuan Mao<sup>1,3,†</sup>, Shuifu Chen<sup>1,3</sup>, Libin Chen<sup>1,3</sup>, Letian Chen<sup>1,2,3</sup>, Yao-Guang Liu<sup>1,2,3,\*</sup>, Yuanling Chen<sup>1,2,3,\*</sup>

<sup>1</sup> State Key Laboratory for Conservation and Utilization of Subtropical Agro-bioresources, Guangzhou 510642, China

<sup>2</sup> Key Laboratory of Plant Functional Genomics and Biotechnology of Guangdong Provincial Higher Education Institutions, Guangzhou 510642, China

<sup>3</sup> College of Life Sciences, South China Agricultural University, Guangzhou 510642, China.

† These authors contributed equally to this work and are joint first authors.

\* Correspondence: pcb2000@scau.edu.cn or ygliu@scau.edu.cn

```

ACACGTTTCA GCTGTCTTTC AGTGTTACAG TAGGTTGTAG AGAGCACAAC AACGTACGTA CACAGCAGCA AAGACTGAGA
CTAGCTAGCT TAGCTGACAT GGCTCCAAGG TGCGCGACGC TGGCGGTGGT GGTGGTGTCTG GTGGCGGCCG TGGTGGCGCC
GCCGACGGCG GTGCGCGCGG CTATCTCGTG CTCGCGGGT TACAACACGC TGATGCCGTG CCGGCCGTAC GTGCAGGCGG
GGGGCACGGT GCCCAGGGCG TGCTGCGGCG GCATTCAGAG CCTGCTCGCC GCCGCAACA ACACCCCGA TCGCCGCACC
ATCTGCGGCT GCCTCAAGAA CGTCGCCAAC GCGCCTCCG GGGGCCCTA CATCACCCGC GCCGCCGCGC TCCCTCCAA
GTGCAACGTC TCCCTCCCTT ACAAGATCAG CACCAGCGTC AACTGCAACG CGTACGTGCA CGCATAAACA CTTCATACT
CTCATTAAAC GAAGTAGAAA ATTTTACAG ACAAATTTAA TTTCTTCTT TGTGCAGGAT AAACTAGGGC GGCCGGCCTG
ATGCGTACGT GTGTGCCCGC GCCTCCCGTA CGAGAGGAGA ATAAAATGTC ATTAGTACCA TCAAATTAAG CTAGCTAGTT
AAGCTTACG AAAATCGATC CCTTCTTCC TCTGTGGTGT TTAGCAGTTT AGGGATCGTA TGCTCCACA GTTCTACTA
TAGTGTGCT TGGGCGATGG TGGAGCTATA TTGTGCACTT TATAAGGTGG TGTTATTATG TAACGCCTGT GCTAGCTTTG
GTCCTGATGT TCTCATGTG AACTGTGTCA ACCGTCCATT GTTCTGCAAA TCTGCAGTAT GTACTGTGTG TGATAGTATC
AAGCTGAACT TCTGAACATG C

```

**Figure S1 The CDS sequence of *PTD1* (*Os01g0822900*)**

The CDS is highlighted in yellow, and 5'UTR and 3'UTR in grey. Sequence between the two exons is the 86-bp intron. The box marks the mutation site, where the sequence of *PTD1* is “GTG”, of *Ptd1* is “TT”. The bold triplets are start codon (ATG) and stop codons (TAA for *Ptd1*; TAG for *PTD1*). The sequence is based on Os01t0822900-03 from:

[https://rapdb.dna.affrc.go.jp/viewer/gene\\_detail/irgsp1?name=Os01t0822900-03](https://rapdb.dna.affrc.go.jp/viewer/gene_detail/irgsp1?name=Os01t0822900-03)

## **Lipid-binding assay of the recombinant PTD1 and Ptd1 proteins**

### **(1) Prokaryotic expression of recombinant PTD1 and Ptd1 proteins**

The coding sequences of PTD1 and Ptd1 (excluding the 27-aa signal peptide) were amplified from stem cDNA of wild-type (*PTD1/PTD1*) and mutant homozygote (*Ptd1/Ptd1*), respectively, using primer pair PTD1/Ptd1-pET32a-F/-R. The nsLTP positive control *OsC6*-specific fragment was amplified from anther cDNA of a rice cultivar Taichung65 (T65) using primer pair OsC6-pET32a-F/-R. The fragments were subsequently cloned into pET-32a (QIAGEN, Germany) prokaryotic expression vector via *NcoI* and *EcoRI* cloning sites. The resultant constructs were transformed into *Escherichia coli* strain transB (DE3) (Transgen Biotech, China). Prokaryotic expression and protein purification were performed as the manufacturer's instruction.

### **(2) Lipid-binding assay of the recombinant PTD1 and Ptd1 proteins**

Lipid binding assay was performed following the published protocols (Zachowski *et al.*, 1998; Zhang *et al.*, 2010). The purified proteins (1  $\mu\text{mol/L}$  in 10 mmol/L MOPS) were mixed with different concentrations of *p*-96 (Invitrogen, USA) and maintained at 25°C. The emission spectrum was measured at 378 nm (excitation at 343 nm) using a Synergy Mx multimode microplate reader (BioTek, USA). The recombinant *OsC6* protein (Zhang *et al.*, 2010) was used as a positive control. The pET32a protein (1  $\mu\text{mol/L}$  in 10 mmol/L MOPS) expressed from the empty vector pET-32a and the MOPS buffer (10 mmol/L) were used as negative controls.

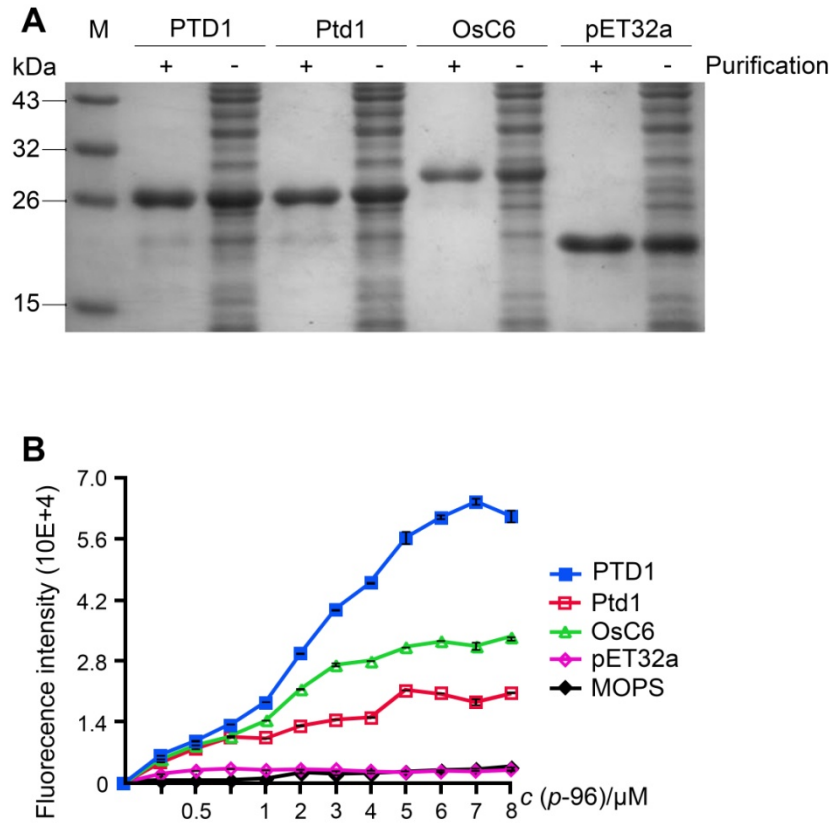

**Figure S2 Recombinant PTD1 protein displays lipid-binding activity**

(A) The expression and purification of recombinant protein PTD1 (MW 26 kDa), Ptd1 (MW 26 kDa) and OsC6 (MW 30 kDa). pET32a (MW 17 kDa) is a control protein expressed from the empty vector pET-32a. Lane M, Standard protein marker; lane -, bacterial lysate; lane +, purified protein. (B) Lipid-binding activity of the recombinant PTD1 and Ptd1 proteins. The purified proteins were mixed with varied concentrations of *p-96*, and relative fluorescence intensities were measured ( $n = 3$ ). Blue and red squares stand for the recombinant PTD1 and Ptd1 proteins, respectively. The pET32a protein (purple rhombus) and MOPS buffer (black rhombus) were used as negative controls. Recombinant rice OsC6 protein (Zhang *et al.*, 2010) was used as the positive control (green triangle).

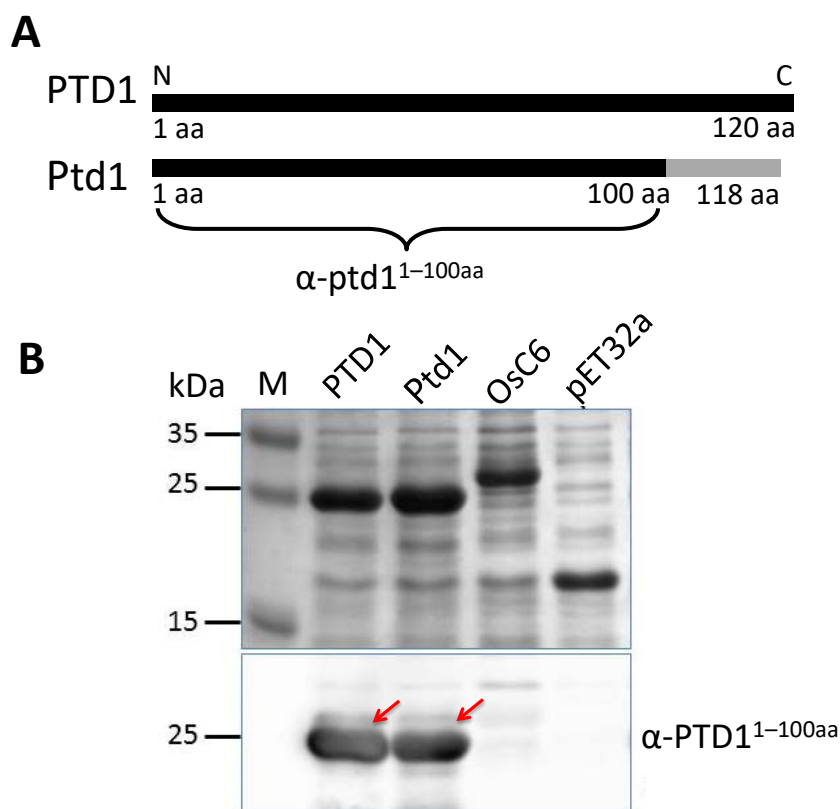

**Figure S3 Verification of the specificity of antibody  $\alpha\text{-PTD1}^{1-100\text{aa}}$  by western blotting**

(A) The 1–100th aa sequence shared by Ptd1 and PTD1 was used as the antigen to produce an anti-PTD1/Ptd1 polyclonal antibody (named  $\alpha\text{-PTD1}^{1-100\text{aa}}$ ) in rabbits (Beijing Genomics Institute, Shenzhen, China). The wild-type PTD1 protein contains 120 aa, while the Ptd1 mutant protein contains 118 aa, of which the grey bar represents the frame-shifted C terminus (101-118th aa) due to a point mutation at the 101st codon in *PTDI*. N, N terminus; C, C terminus.

(B) Verification of the antibody specificity by western blotting. The expressed proteins in the pET-32a prokaryotic expression system were used for western blot assay with the antibody  $\alpha\text{-PTD1}^{1-100\text{aa}}$ . Specific bands (arrowed) were detected in the samples containing PTD1 and Ptd1 protein, but not in with the control nLTP protein OsC6 (Zhang et al, 2010), or in the negative control sample expressed from the empty vector pET-32a. M, marker.

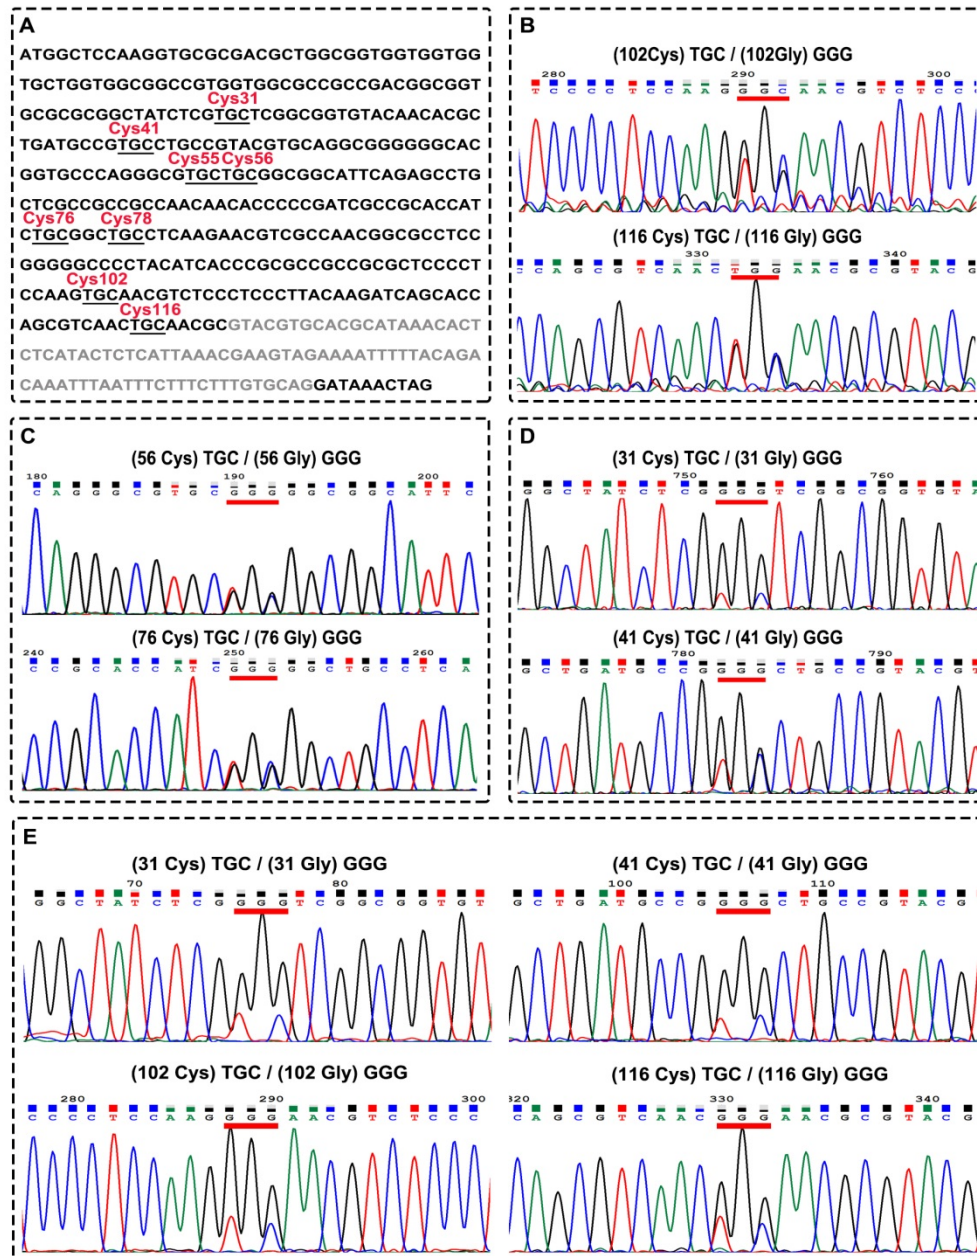

**Figure S4 Sequencing verification of the transgenic plants carrying modified *PTD1* constructs with codon substitutions for the conserved cysteine sites**

(A) Genomic DNA sequence of *PTD1*. The underlined bases are codons for the eight conserved Cys. Bases in grey are intron sequence. (B, C) Sequencing chromatograms of the transgenic plants carrying modified *PTD1* without both 3rd and 4th disulfide bonds due to the Cys-to-Gly substitutions of *PTD1*<sup>C102G/C116G</sup> (B) and *PTD1*<sup>C56G/C76G</sup> (C). (D) Sequencing chromatograms of the transgenic plant carrying modified *PTD1* without both the 1st and 2nd disulfide bonds due to the Cys-to-Gly substitutions of *PTD1*<sup>C31G/C41G</sup>. (E) Sequencing

chromatograms of the transgenic plant carrying modified PTD1 without all four disulfide bonds due to the Cys-to-Gly substitutions of PTD1<sup>C31G/C41G/C102G/C116G</sup>. Red lines mark the positions of the substituted codons. Due to mixture PCR products of the endogenous TGC (Cys) and the transgenic GGG (Gly), these positions display overlapped chromatogram patterns. The phenotypes of these transgenic plants are shown in Figure 6.

**Table S1 List of primers used in this study**

| <b>Primer name</b>          | <b>Primer sequences (5'-3')</b>                             |
|-----------------------------|-------------------------------------------------------------|
| <b>Omega PCR</b>            |                                                             |
| omega-C102G&C116G-F         | GGGAACGTCTCCCTCCCTTACAAGATCAGCACCAGCGTCAACGGGAACGCGTACGT    |
| omega-C102G&C116G-R         | CCCGTTGACGCTGGTGTCTGATCTTGTAAGGGAGGGAGACGTTCCCCTTGGAGGGGAG  |
| omega-C31G&C41G-F           | TCGGGGTCGGCGGTGTACAACACGCTGATGCCGGGGCTGCCGTACGTGCAGGCG      |
| omega-C31G&C41G-R           | CAGCCCCGGCATCAGCGTGTGTACACCGCCGACCCCGAGATAGCCGCGCGCAC       |
| omega-C56G-F                | CCCAGGGCGTGCGGGGGCGGCATTTCAGAGCCTGCTCGCCGCC                 |
| omega-C56G-R                | CTGAATGCCGCCCCCGCACGCCCTGGGCACCGTGCCCCCGC                   |
| omega-C76G-F                | CGCCGCACCATCGGGGGCTGCCTCAAGAACGTCGCCAACGGC                  |
| omega-C76G-R                | CTTGAGGCAGCCCCGATGGTGCGGCGATCGGGGGTGTGTT                    |
| omega-Ptd1:FLAG-F           | GCAGGAGACTACAAAGACGATGACGACAAGTAACTGAGGCGGCCGGCCTGATGC      |
| omega-Ptd1:FLAG-R           | GTTTACTTGTTCGTCATCGTCTTTGTAGTCTCCTGCACAAAGAAAGAAATTAATTTG   |
| <b>Truncated constructs</b> |                                                             |
| PTD1Δ102-120-F              | CCGGGGGCCCTACATCACCCGCGCCGCGCGCTCCCCTCCAATTAGCAACG          |
| PTD1Δ109-120-F              | GCGTCCCCTCCAAGTGCAACGTCTCCCTCCCTTACTAGATCAG                 |
| adapter-F                   | CCGGGGGCCCTACATCACCCGCGCCGCGCGCTCCCCTCCAAGTGCAAC            |
| Bam HI R                    | TTATGGATCCGCGGCATTGTTGCTGTCGGGTTC                           |
| <b>Overlapping PCR</b>      |                                                             |
| PTD1-20aa-F                 | CCTCCGGGGGCCCTACATCAC                                       |
| PTD1-20aa-R                 | GGCCGGCCGCCCTAGTTTATCC                                      |
| 18aa-F                      | GATAAACTAGGGCGGCCGCGCAACAGCACCAGTCCGAGCCTAACTAGGAGTGCTCCTG  |
| 18aa-R                      | CGGGCACACACGTACGCATCAGCGAGTAGCTGTACTGGCAGGAGCACTCCTAGTTAGGC |



PTD1-Terminator-F CGC TGATGCGTACGTGTGTGCCCCG  
Bam HI R TTATGGATCCGCGGCATTGTTGCTGTCGGGGTTC

**CRISPR/Cas9 vector  
construction**

Cas9-PTD1-U3-F GGCAAGGTGCGCGACGCTGGCGG  
Cas9-PTD1-U3-R AAACCCGCCAGCGTCGCGCACCT

**qRT-PCR**

PTD1-qR-F ACAAGATCAGCACCAGCGT  
PTD1-qR-R TGCACAATATAGCTCCACCATC  
Actin-F CACATTCCAGCAGATGTGGA  
Actin-R ACCACAGGTAGCAATAGGTA

**Cloning**

pro-F TTATGGATCC GCGGCATTGTTGCTGTCGGGGTTC  
pro-R ATTAGAATTC CTCCTGCTGCTGGCCTCACAGAC

**Genotyping**

HPT-F ATTTGTGTACGCCCCGACAGT  
HPT-R GTGCTTGACATTGGGGAGTT  
Cas9-F CTGACGCTAACCTCGACAAG  
Cas9-R CCGATCTAGTAACATAGATGACACC  
endo-PTD1-F GTTTATGCGTGACGTACGCGTTG  
endo-PTD1-R GCATGCATACGATCGAGACGTAC  
Ptd1-FLAG-F CCTCAAGAACGTCGCCAAC  
Ptd1-FLAG-R1 GTCAACCGTCCATTGTTCTGC  
Ptd1-FLAG-R2 GGATCGTATGTCTCCACAG

**HRM**

|             |                     |
|-------------|---------------------|
| HRM-P1      | CGTACGCGTTGCAGTTGAC |
| HRM-P2      | CCTCAAGAACGTCGCCAAC |
| HRM-P3      | TGGTGCTGATCTTGTAAG  |
| HRM-PTD1-P4 | GCGCTATTCTCCAAGTG   |
| HRM-Ptd1-P4 | GCGCTATTCTCCAATTCA  |

**Prokaryotic expression vectors**

|                    |                                          |
|--------------------|------------------------------------------|
| PTD1/Ptd1-pET32a-F | CATG <u>CCATGG</u> CTATCTCGTGCTCGG       |
| PTD1/Ptd1-pET32a-R | AGGCGA <u>ATTC</u> CCCTAGTTTATCGCGTTGCAG |
| OsC6-pET32a-F      | CATG <u>CCATGG</u> CGCCGTCCAAGTCCACAGCCG |
| OsC6-pET32a-R      | AGGCGA <u>ATTC</u> CTCATATATACTCAGGCAGAT |

**Table S2 Genotypes and sequencing chromatograms of the CRISPR/Cas9 knockout mutants of *PTD1* and *Ptd1***

| Gene        | Line    |                          | Target mutation          | Mutation type |
|-------------|---------|--------------------------|--------------------------|---------------|
| <i>PTD1</i> | 1       | Ref                      | AAGGTGCGCGACGCTGGCGGTGG  | Homozygous    |
|             |         | Allele1                  | AAGGTGCGCGAC-----CGGTGG  |               |
|             |         | Allele2                  | AAGGTGCGCGAC-----CGGTGG  |               |
|             |         |                          |                          |               |
|             | 2       | Ref                      | AAGGTGCGCGACGCTGGCGGTGG  | Homozygous    |
|             |         | Allele1                  | AAGGTGCGCGACG-----CGGTGG |               |
| Allele2     |         | AAGGTGCGCGACG-----CGGTGG |                          |               |
|             |         |                          |                          |               |
| 3           | Ref     | AAGGTGCGCGACGCTGG-CGGTGG | Biallelic                |               |
|             | Allele1 | AAGGTGCGCGAC-----CGGTGG  |                          |               |
|             | Allele2 | AAGGTGCGCGACGCTGGTCGGTGG |                          |               |
|             |         |                          |                          |               |
| <i>Ptd1</i> | 1       | Ref                      | AAGGTGCGCGACGCTGG-CGGTGG | Homozygous    |
|             |         | Allele1                  | AAGGTGCGCGACGCTGGTCGGTGG |               |
|             |         | Allele2                  | AAGGTGCGCGACGCTGGTCGGTGG |               |
|             |         |                          |                          |               |
|             | 2       | Ref                      | AAGGTGCGCGACGCTGG-CGGTGG | Homozygous    |
|             |         | Allele1                  | AAGGTGCGCGACGCTGGACGGTGG |               |
| Allele2     |         | AAGGTGCGCGACGCTGGACGGTGG |                          |               |
|             |         |                          |                          |               |

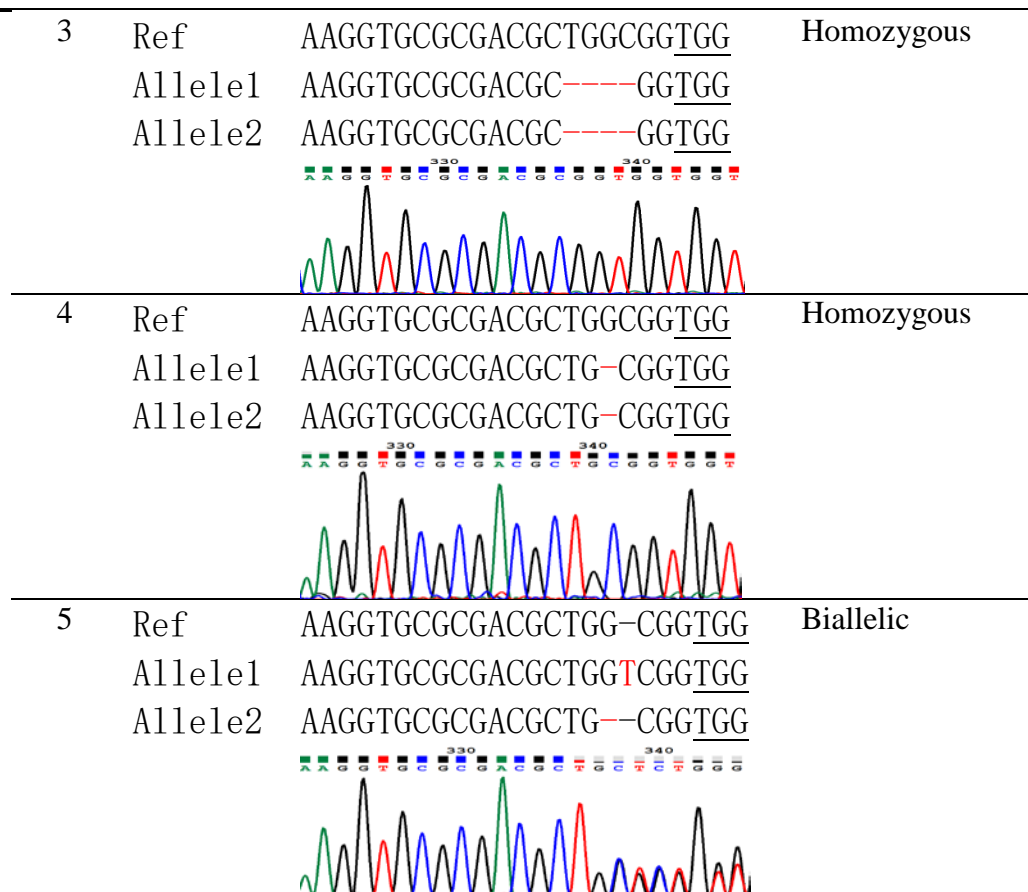

**Note:** Ref, target reference sequences; underlined bases indicate protospacer adjacent motif (PAM); red letter indicates base insertion; red dash indicates base deletion; black dash is for alignment. The phenotypes of the knockout plants are shown in Figure 4. The mutant allelic sequences of the sequencing chromatograms were analyzed using the DSDecode program (Liu et al., 2015; Xie et al., 2017).

## References

- Liu W, Xie X, Ma X, Li J, Chen J, Liu Y-G.** 2015. DSDecode: A web-based tool for decoding of sequencing chromatograms for genotyping of targeted mutations. *Molecular Plant* **8**, 1431-1433.
- Xie X, Ma X, Zhu Q, Zeng D, Li G, Liu Y-G.** 2017. CRISPR-GE: A convenient software toolkit for CRISPR-based genome editing. *Molecular Plant* **10**, 1246-1249.
- Zachowski A, Guerbette F, Grosbois M, Jolliot Croquin A, Kader JC.** 1998. Characterisation of acyl binding by a plant lipid-transfer protein. *European journal of biochemistry* **257**, 443-448.
- Zhang D, Liang W, Yin C, Zong J, Gu F, Zhang D.** 2010. *OsC6*, encoding a lipid transfer protein (LTP), is required for postmeiotic anther development in rice. *Plant Physiology*, **154**, 149-162.
